# Supplementary material
Source: publisher figshare collection journal article supplement (https://sage.figshare.com/ndownloader/files/23117195)
Supplement: Supplementary file 1 [file 23117195]

Appendix 1. Quality of observational studies (indicators from  
New-Castle-Ottawa scale)

| study         | 1 <sup>a</sup> | 2 <sup>b</sup> | 3 <sup>c</sup> | 4 <sup>d</sup> | 5A <sup>e</sup> | 5B <sup>f</sup> | 6 <sup>g</sup> | 7 <sup>h</sup> | 8 <sup>i</sup> | Total<br>quality<br>scores |
|---------------|----------------|----------------|----------------|----------------|-----------------|-----------------|----------------|----------------|----------------|----------------------------|
| Miyake, 2017  | Yes            | Yes            | Yes            | Yes            | Yes             | Yes             | Yes            | Yes            | Yes            | 9                          |
| Norris, 2017  | Yes            | Yes            | Yes            | Yes            | No              | No              | Yes            | Yes            | Yes            | 7                          |
| Salem,2017    | Yes            | Yes            | Yes            | Yes            | Yes             | Yes             | No             | Yes            | Yes            | 8                          |
| Pilon,2017    | Yes            | Yes            | Yes            | Yes            | Yes             | Yes             | No             | Yes            | Yes            | 8                          |
| Al-Ali, 2018  | Yes            | Yes            | Yes            | Yes            | Yes             | No              | Yes            | Yes            | Yes            | 8                          |
| Antoine,2018  | Yes            | Yes            | Yes            | Yes            | Yes             | Yes             | No             | Yes            | Yes            | 8                          |
| Richter, 2016 | Yes            | Yes            | Yes            | Yes            | No              | No              | Yes            | Yes            | Yes            | 7                          |
| Lista,2016    | Yes            | Yes            | Yes            | Yes            | No              | No              | Yes            | Yes            | Yes            | 7                          |
| Heo,2017      | Yes            | Yes            | Yes            | Yes            | No              | No              | Yes            | Yes            | Yes            | 7                          |
| Selvi,2018    | Yes            | Yes            | Yes            | Yes            | No              | No              | Yes            | Yes            | Yes            | 7                          |
| García,2018   | Yes            | Yes            | Yes            | Yes            | Yes             | No              | Yes            | Yes            | Yes            | 8                          |
| Khalaf,2018   | No             | Yes            | Yes            | Yes            | Yes             | Yes             | Yes            | Yes            | Yes            | 8                          |
| Shore, 2018   | Yes            | Yes            | Yes            | No             | Yes             | Yes             | No             | Yes            | Yes            | 7                          |
| Dearden, 2018 | Yes            | Yes            | Yes            | Yes            | Yes             | Yes             | No             | Yes            | Yes            | 9                          |

<sup>a</sup> Indicates exposed cohort truly representative

<sup>b</sup> Non-exposed cohort drawn from the same community

<sup>c</sup> Ascertainment of exposure from the same community

<sup>d</sup> Outcome of interest not present at start of study

<sup>e</sup> Cohorts comparable on basis of site and etiology of infection

<sup>f</sup> Cohorts comparable on others factors

<sup>g</sup> Assessment of outcome of record linkage or independent blind assessment

<sup>h</sup> Follow-up long enough for outcomes to occur.

<sup>i</sup> Complete accounting for cohorts
